# Supplementary material
Source: Springer Nature journal article supplement (https://www.springermedizin.de/resource/supplementary/12931_2013_1385_MOESM6_ESM.pdf/9426136)

TGCre<sup>-/-</sup>;PDGFR<sup>α</sup>F<sup>-/-</sup>

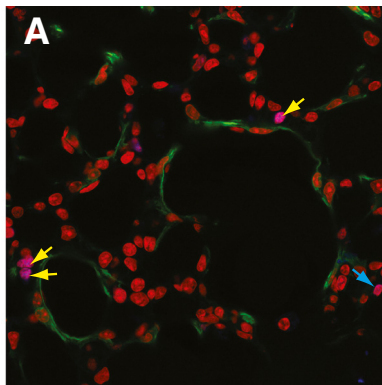

TGCre<sup>+/-</sup>;PDGFR<sup>α</sup>F<sup>F</sup>

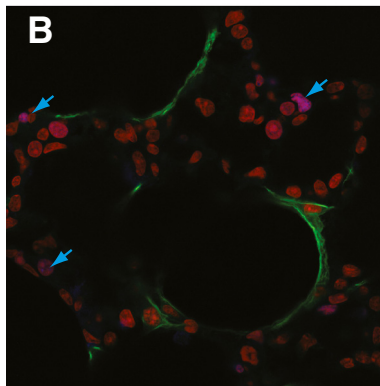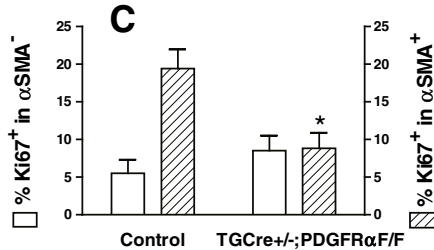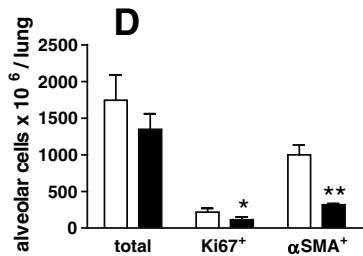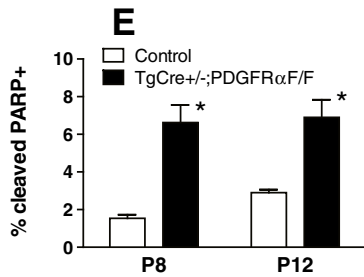

Supplement: MOESM6 [file 9426136]
